# Supplementary material
Source: MDPI journal article supplement (https://www.mdpi.com/2624-7402/6/2/74)

**Table S1:** Zarrouk (1966) medium composition.

| Components                                                                                                                                                                                             | Concentration           |
|--------------------------------------------------------------------------------------------------------------------------------------------------------------------------------------------------------|-------------------------|
| NaHCO <sub>3</sub>                                                                                                                                                                                     | 16,8 mg.L <sup>-1</sup> |
| K <sub>2</sub> HPO <sub>4</sub>                                                                                                                                                                        | 0,5 mg.L <sup>-1</sup>  |
| NaNO <sub>3</sub>                                                                                                                                                                                      | 2,5 mg.L <sup>-1</sup>  |
| K <sub>2</sub> SO <sub>4</sub>                                                                                                                                                                         | 1,0 mg.L <sup>-1</sup>  |
| NaCl                                                                                                                                                                                                   | 1,0 mg.L <sup>-1</sup>  |
| MgSO <sub>4</sub> .7H <sub>2</sub> O                                                                                                                                                                   | 0,2 mg.L <sup>-1</sup>  |
| CaCl <sub>2</sub> .2H <sub>2</sub> O                                                                                                                                                                   | 0,04 mg.L <sup>-1</sup> |
| FeSO <sub>4</sub> .7H <sub>2</sub> O                                                                                                                                                                   | 0,01 mg.L <sup>-1</sup> |
| Ethylenediaminetetraacetic acid (EDTA)                                                                                                                                                                 | 0,08 mg.L <sup>-1</sup> |
| Trace metals (H <sub>3</sub> BO <sub>3</sub> , MnCl <sub>2</sub> .4H <sub>2</sub> O, ZnSO <sub>4</sub> .4H <sub>2</sub> O,<br>Na <sub>2</sub> MoO <sub>4</sub> , CuSO <sub>4</sub> .5H <sub>2</sub> O) | 1 mg.L <sup>-1</sup>    |
| Thiamine (B1)                                                                                                                                                                                          | 1 mg.L <sup>-1</sup>    |
| Cyanocobalamin (B12)                                                                                                                                                                                   | 1 mg.L <sup>-1</sup>    |
| Biotin (B7)                                                                                                                                                                                            | 1 mg.L <sup>-1</sup>    |

**Figure S1.** DNS solution calibration curve for acid-labile carbohydrates concentration in *Spirulina maxima*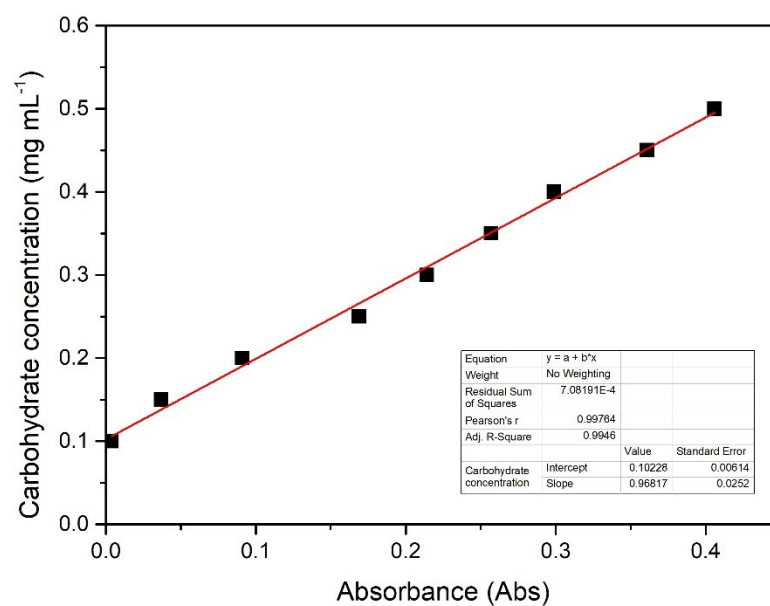

Supplement: s1 [file s1]
